# Supplementary material for: Noncoding transcription influences the replication initiation program through chromatin regulation
Source: PubMed Central journal article supplement — Genome Res. 2018 Dec;28(12):1882–93. doi: 10.1101/gr.239582.118 (PMC6280764; doi:10.1101/gr.239582.118), 2018-12
Supplement: supp_gr.239582.118_Supplemental_Material.pdf [file supp_gr.239582.118_Supplemental_Material.pdf]

## **Supplemental Materials and Methods**

### **Yeast strains and growth conditions**

All strains were derived from W303 and Anchor-Away genetic backgrounds (see Supplemental Table S2) (Haruki et al. 2008). Cells were grown in YEPD medium (1% yeast extract, 1% peptone) supplemented with 2% glucose as carbon source. The BrdU incorporation cassette was introduced according to (Viggiani and Aparicio 2006). Anchor-away of Nrd1-AA, Nrd1-AA *set2Δ*, Rrp6-AA or Ysh1-AA strains was induced by adding 1μg/ml of rapamycin to the medium.

### **G1-phase synchronization and BrdU labeling**

Cells grown at 30°C to an OD<sub>600</sub>= 0.4 were synchronized in G1-phase with α-factor (20 ng/ml, Sigma) for 3h in total. After two washes with distilled water, cells were released into S-phase at 18°C. Depending on the experiment, cells were released in YEPD medium containing BrdU (100 μg/ml, Sigma) and treated or not with rapamycin. Cells were then collected at different times after G1-release and treated with 0.1% Sodium Azide (Sigma). Flow cytometry was performed on ethanol-fixed cells using propidium iodide (Sigma). Flow cytometry profiles were obtained using Gallios flow cytometer (Beckman-Coulter) before data analyses using FlowJo software (LLC).

### **RNA extraction and Reverse Transcription-qPCR**

RNAs were extracted using TRIzol (Invitrogen). Purified nucleic acids were first treated with DNase (Ambion) before reverse transcription using SuperScript II (Invitrogen). cDNA was then amplified using the SYBR select master mix for CFX (Applied Biosciences) on a CFX96 Real-time detection system (Bio-Rad). Primers are available upon request.

### **BrdU immunoprecipitation**

Genomic DNA was sonicated into 300-400 bp fragments and denatured. 5μg BrdU antibody (BD PharMingen, 555627) coupled to 75μl of Dynabeads Protein G (Invitrogen) were added to 5μg of denatured BrdU-containing genomic DNA in BrdU IP buffer (PBS +

0.0625% Triton X-100). After 1 hour incubation at room temperature on a wheel, beads were washed twice with BrdU IP buffer and eluted in Tris-HCl 10mM (pH 8.0), EDTA 1mM, 1% SDS. Eluates were cleared of SDS using the NucleoSpin Gel and PCR Clean-up (Macherey-Nagel).

### **Chromatin Immunoprecipitation (ChIP)**

Antibodies against H3 (Abcam ab1791), H3K36me3 (Abcam ab9050) and H3K18ac (Abcam ab1191) were incubated with Protein G dynabeads (Invitrogen) before being mixed with sonicated chromatin and incubated on a wheel at 4°C for 2 hours. After washes, immunoprecipitated chromatin was eluted before being purified on columns (Macherey-Nagel).

### **Transcriptional readthrough calculation for RNA Pol II PAR-CLIP**

Induced transcriptional readthrough was calculated as follows. First, mean densities of Top and Bottom strands in each condition were calculated on oriented ARS between the ACS to +100bp considering this region as 1bin using HTS bioscript. A pseudo-count of 1 was added to each value to correct for low values, which could lead to overestimated ratios defined hereafter. The total readthrough was then calculated by adding the values obtained for Top and Bottom in +Rap divided by the sum of Top and Bottom in –Rap. For Fig. 3, Top and Bottom strand values were added to get the total amount of natural readthrough. Three classes of ARS with different levels of natural readthrough (High, Mid and Low) were then defined through the use of *k*-means clustering (<http://scistatcalc.blogspot.ch/2014/01/k-means-clustering-calculator.html>).

Viggiani CJ, Aparicio OM. 2006. New vectors for simplified construction of BrdU-Incorporating strains of *Saccharomyces cerevisiae*. *Yeast* **23**: 1045-1051.

# Supplemental Fig. S1

**A**

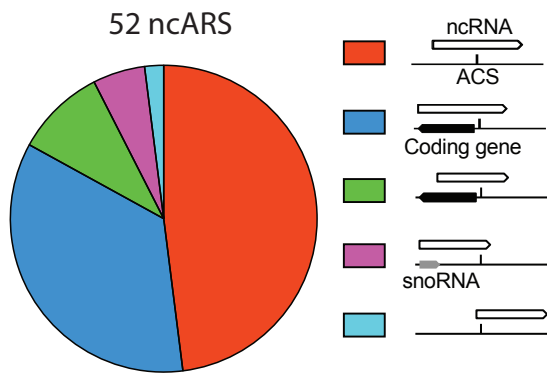

**B**

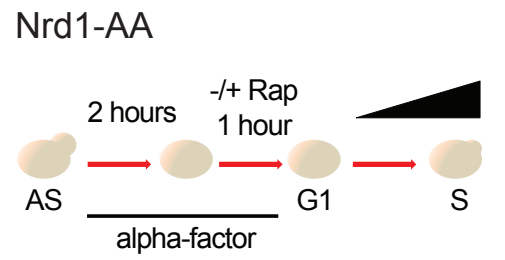

**C**

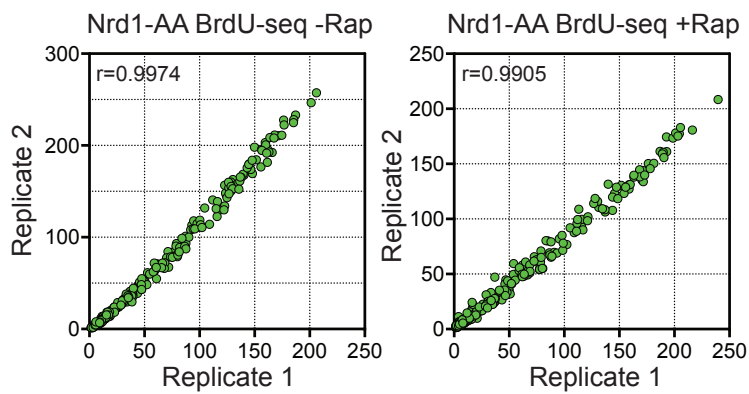

**D**

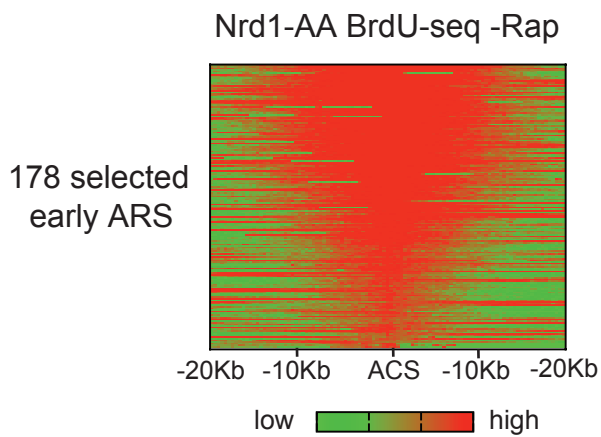

**E**

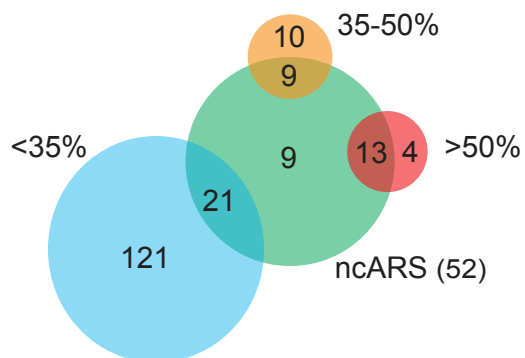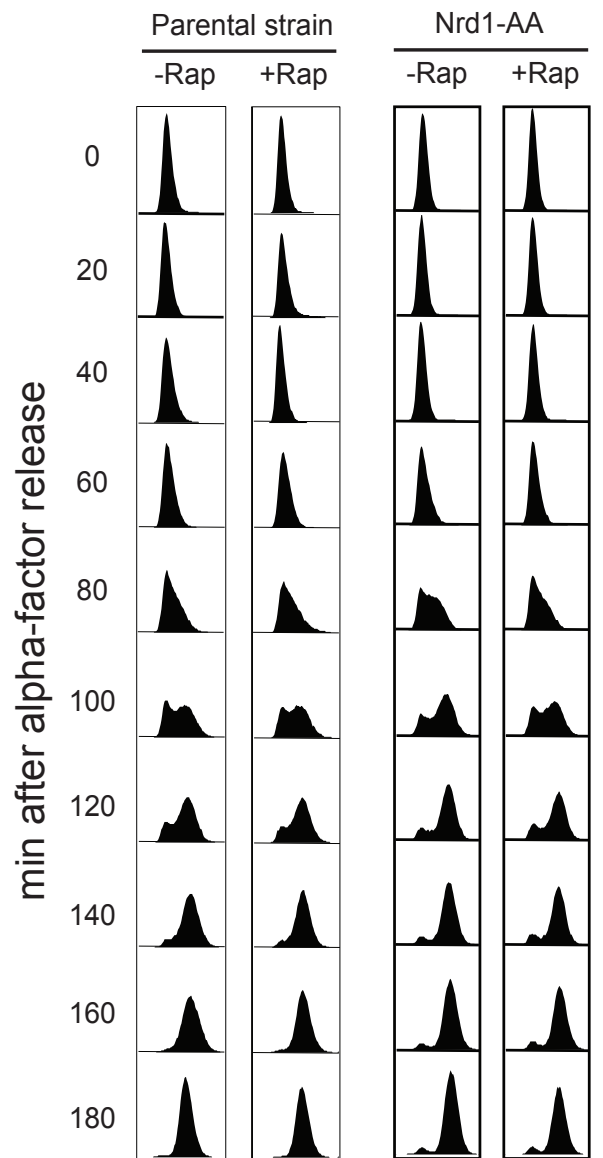

**Supplemental Fig. S1: related to Fig. 1.**

**(A)** Configuration distributions of the 52 ncRNAs-containing ARS (ncARS) with respect to the ACS. **(B)** FACS profiles of S-phase progression for the Nrd1-AA strain. **(C)** The mean coverage of BrdU nascent DNA in a 5Kb window centered around the ACS was measured for the 178 ARS taken into account in Fig. 1E. The plots represent this mean coverage for the 2 replicates in either -Rap or +Rap. **(D)** Heatmap representing the BrdU-seq densities ( $\log_2$ ) 20Kb around the ACS of the 178 replication origins considered as active in the experiment. **(E)** Overlap between the 52 ncRNA-containing ARS and the different classes of BrdU incorporation-defective replication origins in +Rap versus -Rap. The ncARS strongly overlap with the most affected ARS.

A

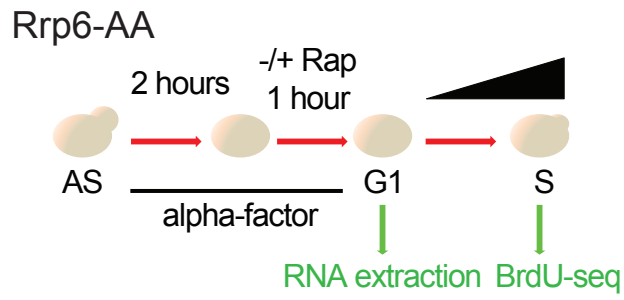

B

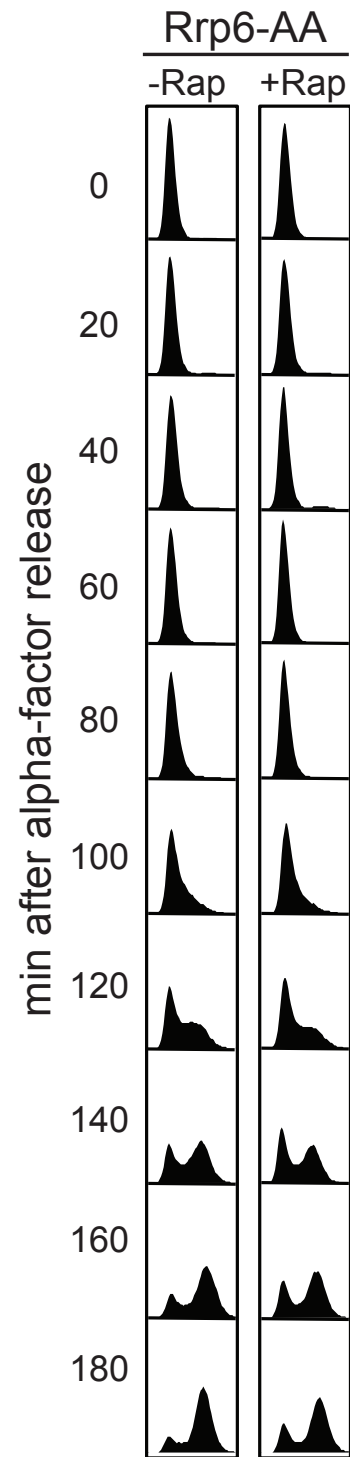

C

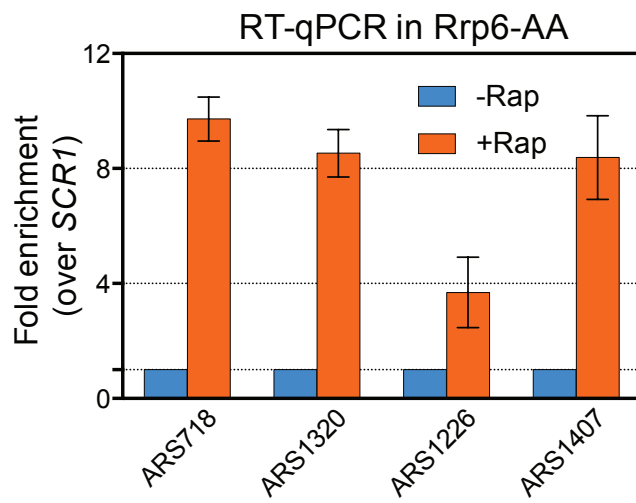

D

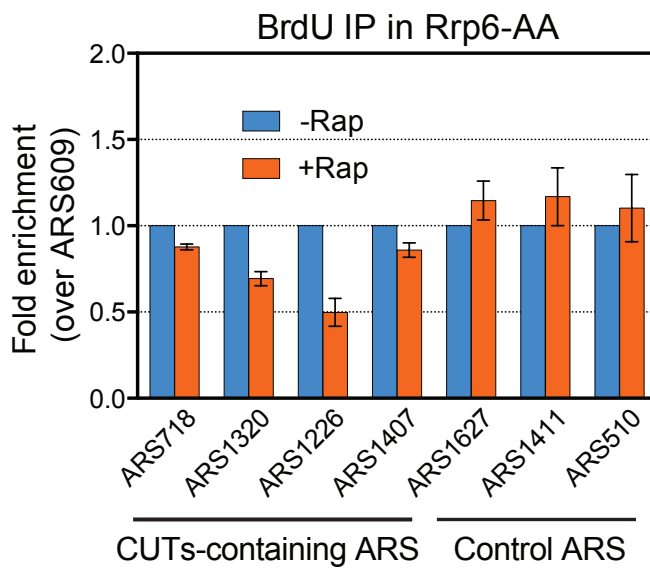

**Supplemental Fig. S2: related to Fig. 1.**

**(A)** Rrp6-AA cells were treated as in Fig. 1C. RNA was extracted in G1-phase while DNA extraction and BrdU immunoprecipitation were performed at the 80 min time point following release into S-phase. **(B)** FACS profiles of S-phase progression for the Rrp6-AA strain. **(C)** RT-qPCR analysis of CUTs-containing ARS in G1-phase synchronized cells with or without 1h rapamycin treatment. Measured ncRNAs were normalized to *SCR1* RNA. **(D)** Analysis of BrdU incorporation after 80 min of S-phase release at 18°C. Three ARS which do not contain CUTs were used as controls. Fold enrichment represents the ratio of immunoprecipitated BrdU for a given ARS over the value of the very late replicated origin ARS609. For **(C)** and **(D)**, the fold enrichment was artificially set to 1 for the -Rap condition (n=3). Error bars represent SEM.

# Supplemental Fig. S3

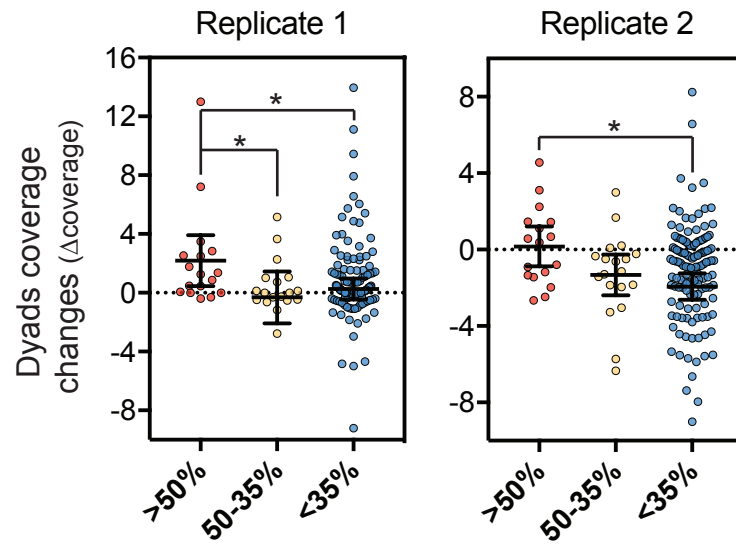

**Supplemental Fig. S3: related to Fig. 2.**

Scatter dot plot representing the difference of dyads coverage ( $\Delta\text{coverage} = \text{coverage (+Rap)} - \text{coverage (-Rap)}$ ) between the ACS to +100 of oriented ARS when comparing +Rap and -Rap conditions separately for Replicate 1 and 2. For each replicate, the class of ARS affected >50% in replication is significantly different from the class affected <35% (p-values <0.015 for replicate 1 and <0.024 for replicate 2).



# Supplemental Fig. S4

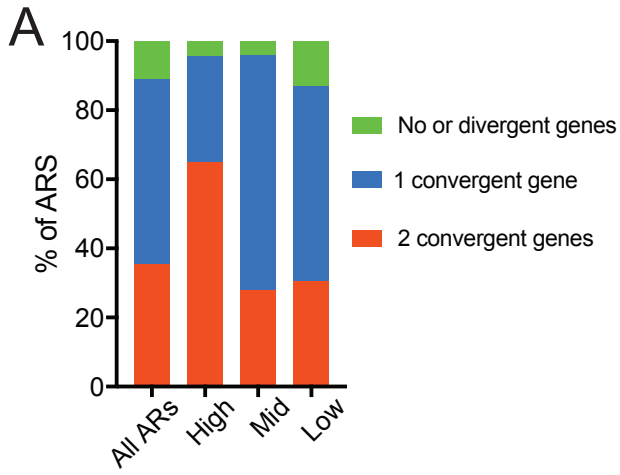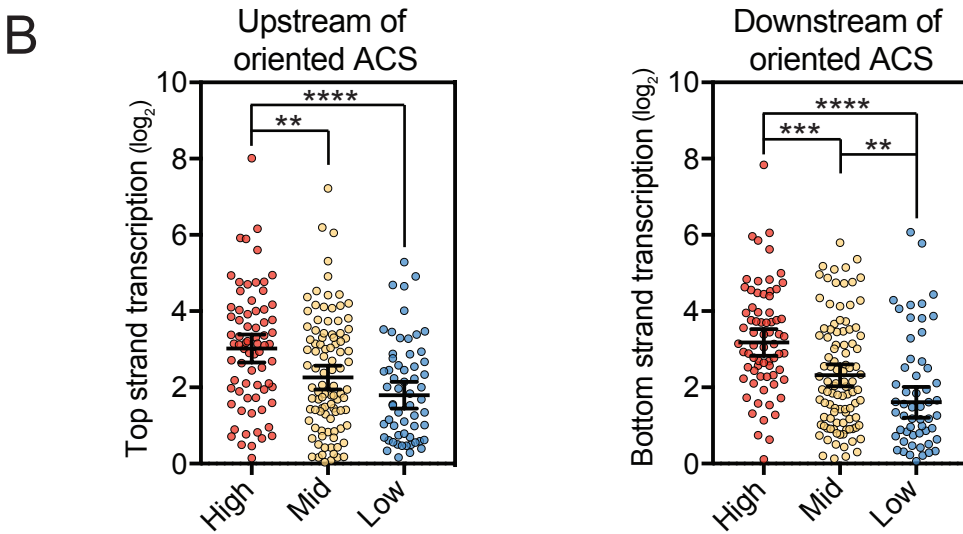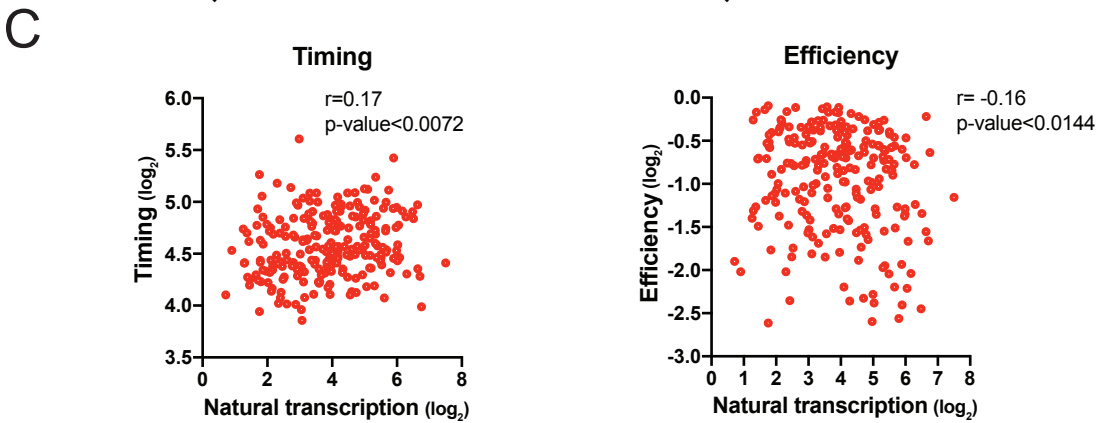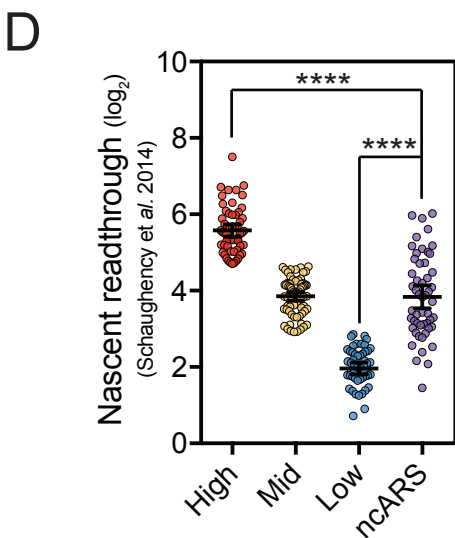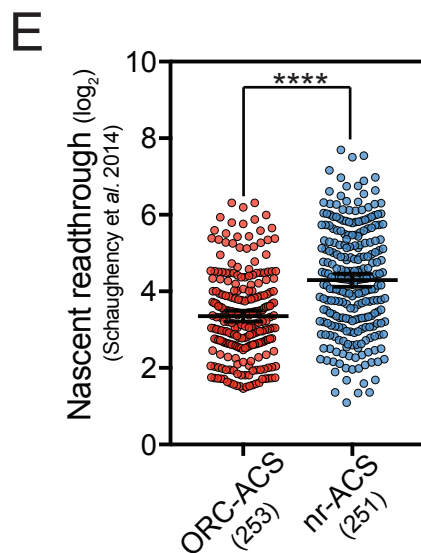

**Supplemental Fig. S4: related to Fig. 3.**

**(A)** Gene configuration around All ARS, High, Mid and Low classes of transcribed ARS. A gene was considered as convergent if pointing to the ARS within a distance <500bp to the ACS. **(B)** Scatter dot plot of nascent transcription pointing toward the ARS either Upstream (-400 to -300bp) or Downstream (+400 to +500bp) relative to the oriented ACS. **(C)** Scatter dot plot showing the global correlation between nascent transcription in the ACS to +100bp and Timing or Efficiency, respectively.  $r$  corresponds to the Pearson correlation coefficient. **(D)** Scatter dot plot representing natural readthrough of CUTs/NUTs-containing ARS (ncARS) versus High, Mid and Low classes. **(E)** Scatter dot plot presenting nascent transcription in the ACS to +100bp region for ORC-bound ACS (ORC-ACS) and non-replicated ACS (nrACS) as defined in Eaton et al., 2010.

# Supplemental Fig. S5

**A**

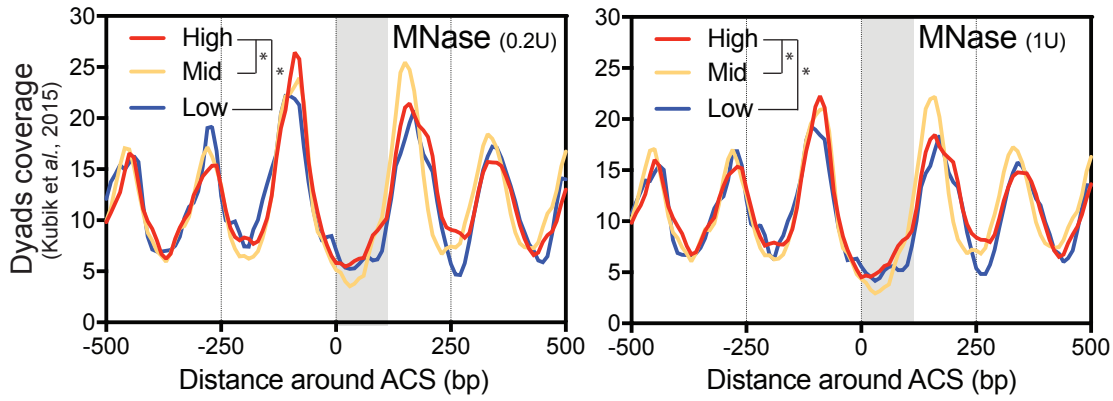

**B**

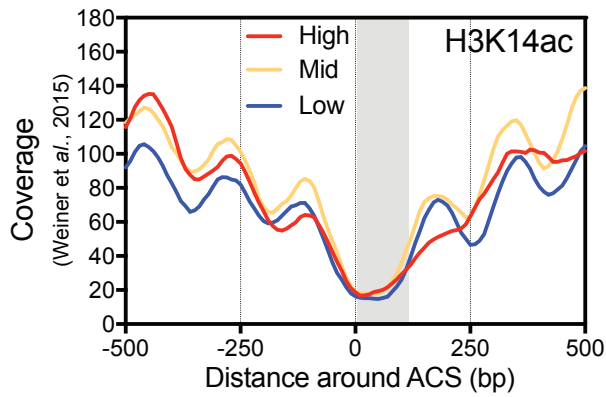

**C**

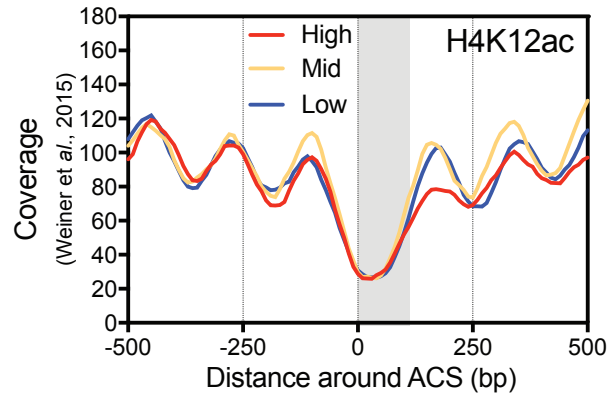

**D**

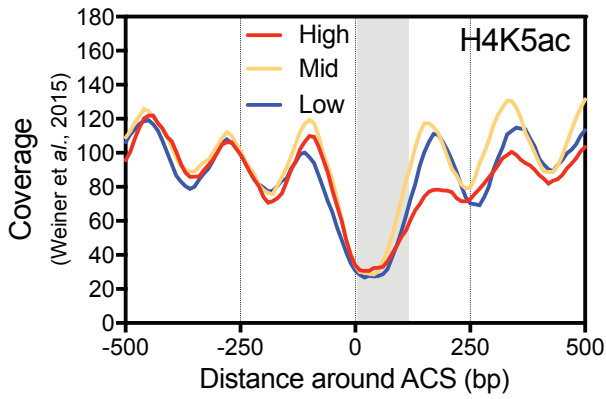

**E**

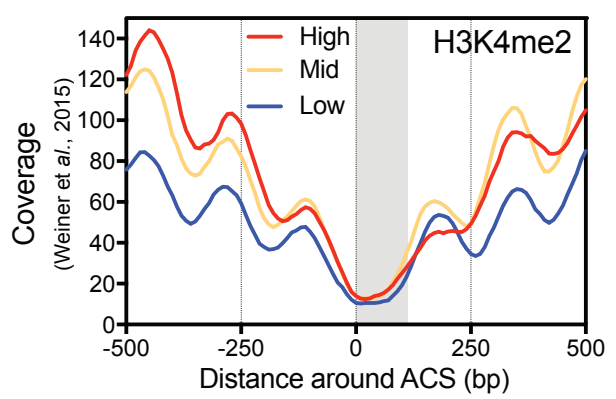

**F**

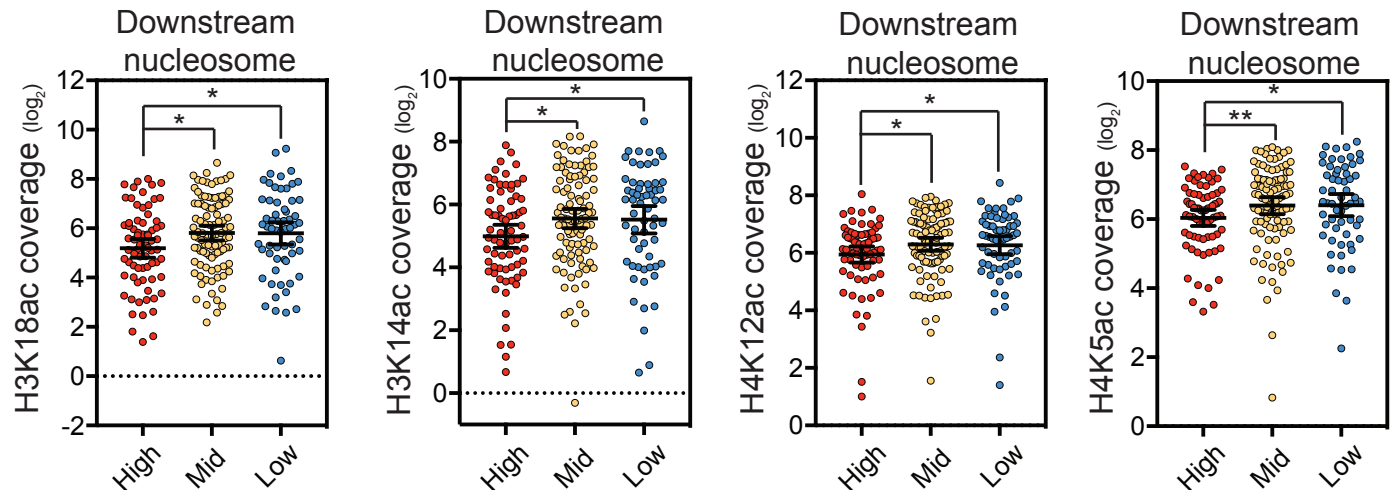

**Supplemental Fig. S5: related to Fig. 3.**

**(A)(B)(C)(D)(E)** Metagene analysis of MNase-seq performed with two different concentrations of MNase, H3K14ac, H4K12ac, H4K5ac and H3K4me2 profiles around the ACS of the High, Mid and Low classes of ARS. Data were retrieved from (Belsky et al. 2015; Kubik et al. 2015; Weiner et al. 2015). Results were smoothed over a 10bp-moving window. No significant differences were detected over the ACS to +100bp region. **(F)** H3K18ac, H3K14ac, H4K12ac, and H4K5ac coverages were measured over the downstream nucleosome (between 160bp to 200bp from the ACS) of the 3 classes considering this region as 1 bin.

# Supplemental Fig. S6

**A**

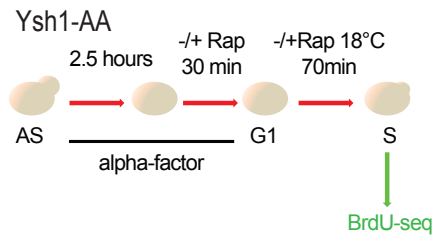

**B**

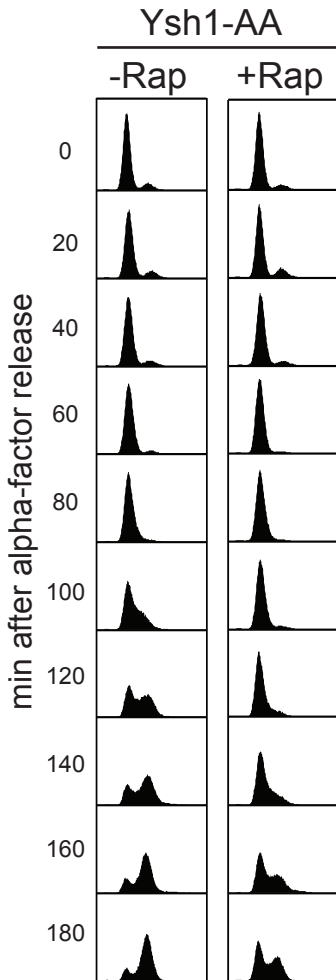

**C**

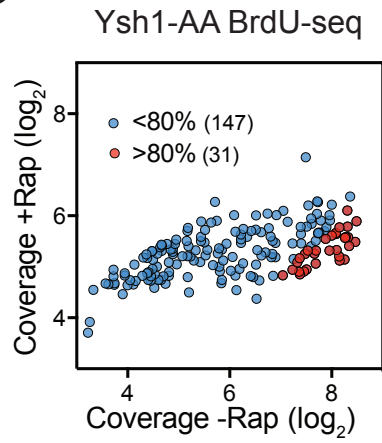

**D**

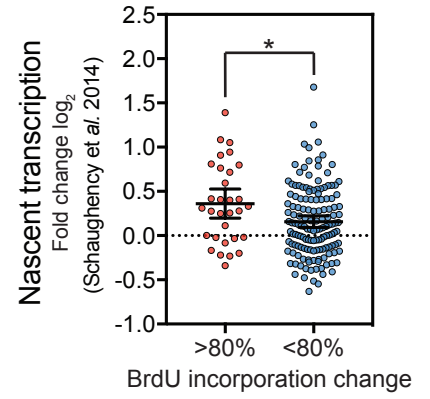

**E**

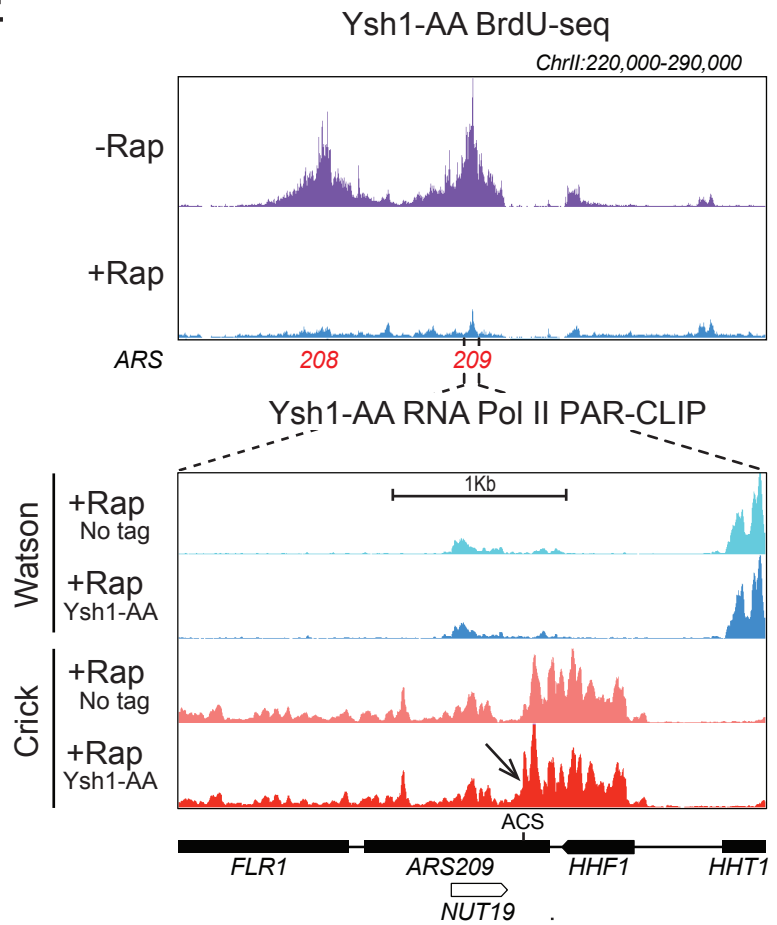

**Supplemental Fig. S6: related to Fig. 4.**

**(A)** Ysh1-AA cells were synchronized in G1-phase with alpha-factor during 3 hours at 30°C. During the last 30min, rapamycin (Rap) was added or not in the medium. Cells were then washed and released into the cell cycle at 18°C in the presence of BrdU and -/+Rap. After 70min, cells were collected for DNA extraction and BrdU-seq. **(B)** FACS analysis of the Ysh1-AA strain. Cells were treated as indicated in A. **(C)** Scatter plot depicting the mean coverage of BrdU nascent DNA over the same 178 ARS as in Fig. 1E. The 31 red dots and 147 blue dots represent the ARS showing >80% and <80% decrease in BrdU incorporation in +Rap versus -Rap respectively. **(D)** Scatter dot-plots representing the ratio  $\log_2$  +Rap/-Rap of the RNA PolII PAR-CLIP signal from both strands between the ACS and +100 of oriented ARS in the Ysh1-AA strain at the 2 classes of ARS defined above. **(E)** Top: Snapshot illustrating the BrdU incorporation defect in the Ysh1-AA strain. Bottom: zoom over the ARS209 showing the *HHF1* gene readthrough transcription over the ACS by RNA PolII PAR-CLIP. Transcriptional readthrough is indicated by an arrow.

A

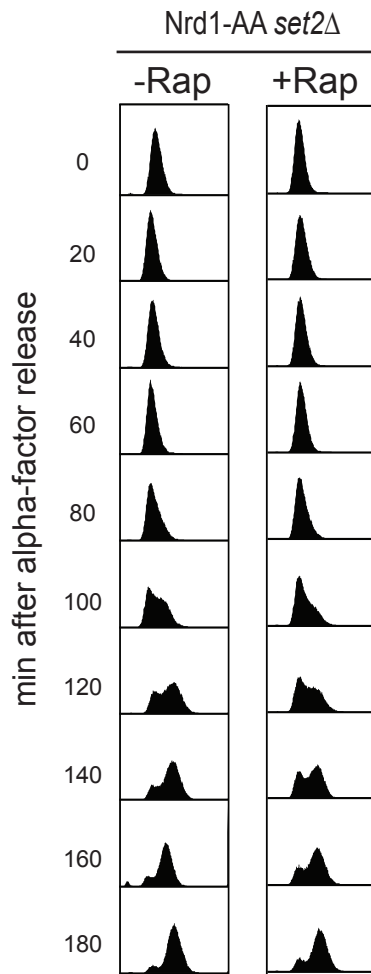

B

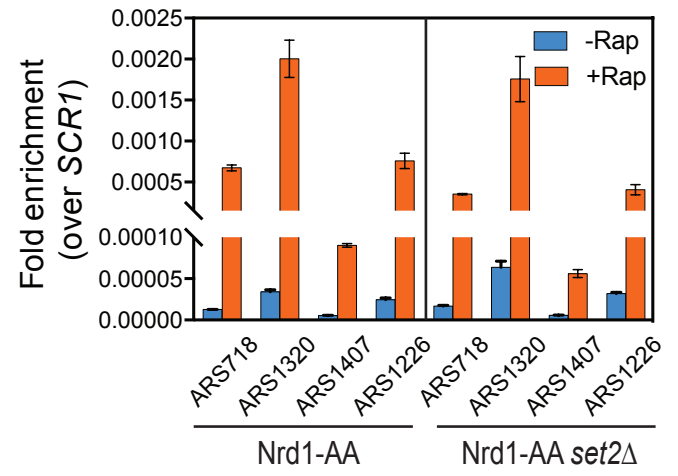

**Supplemental Fig. S7: related to Fig. 5.**

**(A)** FACS analysis of the Nrd1-AA *set2Δ* strain. Cells were treated as shown in Fig. 5A. **(B)** RT-qPCR analysis of NUTs-containing ARS in the Nrd1-AA and Nrd1-AA *set2Δ* strains with or without 1h rapamycin treatment. Measured ncRNAs were normalized to *SCR1* RNA.



**Supplemental Table 1. List of the 234 ARS features used in this study.**

| <b>Chr</b> | <b>ACS</b> | <b>ARS</b> | <b>Orientation</b> | <b>Timing (min)</b> | <b>Efficiency (%)</b> |
|------------|------------|------------|--------------------|---------------------|-----------------------|
| chrI       | 147536     | ARS108     | -                  | 23.735              | 0.668                 |
| chrI       | 124521     | ARS107     | -                  | 27.404              | 0.741                 |
| chrI       | 70432      | ARS106     | -                  | 31.291              | 0.218                 |
| chrI       | 42059      | ARS105     | +                  | 28.660              | 0.326                 |
| chrII      | 237875     | ARS208     | -                  | 15.588              | 0.695                 |
| chrII      | 63373      | ARS202     | -                  | 19.066              | 0.616                 |
| chrII      | 486897     | ARS216     | -                  | 19.982              | 0.760                 |
| chrII      | 255081     | ARS209     | -                  | 24.969              | 0.501                 |
| chrII      | 418010     | ARS215     | -                  | 25.267              | 0.488                 |
| chrII      | 774020     | ARS227     | -                  | 27.550              | 0.431                 |
| chrII      | 802270     | ARS229     | -                  | 28.119              | 0.588                 |
| chrII      | 170263     | ARS207     | -                  | 31.714              | 0.377                 |
| chrII      | 408041     | ARS214     | -                  | 34.844              | 0.391                 |
| chrII      | 622754     | ARS220     | +                  | 21.272              | 0.700                 |
| chrII      | 326193     | ARS211     | +                  | 27.165              | 0.766                 |
| chrII      | 632018     | ARS221     | +                  | 29.128              | 0.301                 |
| chrII      | 611771     | ARS219.5   | +                  | 32.332              | 0.255                 |
| chrIII     | 39591      | ARS305     | -                  | 16.238              | 0.591                 |
| chrIII     | 108972     | ARS307     | -                  | 17.568              | 0.345                 |
| chrIII     | 74523      | ARS306     | +                  | 14.501              | 0.777                 |
| chrIII     | 224858     | ARS315     | +                  | 17.452              | 0.837                 |
| chrIII     | 166657     | ARS310     | +                  | 18.158              | 0.409                 |
| chrIII     | 132042     | ARS309     | +                  | 21.817              | 0.543                 |
| chrIII     | 315816     | ARS319     | +                  | 23.144              | 0.247                 |
| chrIV      | 484036     | ARS417     | -                  | 16.834              | 0.536                 |
| chrIV      | 555399     | ARS418     | -                  | 17.234              | 0.924                 |
| chrIV      | 1159443    | ARS432     | -                  | 18.662              | 0.478                 |
| chrIV      | 1166175    | ARS432.5   | -                  | 19.201              | 0.644                 |
| chrIV      | 1302759    | ARS435     | -                  | 20.016              | 0.704                 |
| chrIV      | 505519     | ARS417.5   | -                  | 20.838              | 0.562                 |
| chrIV      | 329742     | ARS413     | -                  | 21.937              | 0.660                 |
| chrIV      | 212593     | ARS409     | -                  | 29.550              | 0.558                 |
| chrIV      | 46222      | ARS404     | -                  | 30.060              | 0.668                 |
| chrIV      | 629309     | ARS420     | -                  | 31.775              | 0.587                 |
| chrIV      | 640065     | ARS421     | -                  | 34.626              | 0.415                 |
| chrIV      | 1461904    | ARS442     | +                  | 19.074              | 0.278                 |
| chrIV      | 408132     | ARS414     | +                  | 20.703              | 0.374                 |
| chrIV      | 913862     | ARS428     | +                  | 21.341              | 0.401                 |
| chrIV      | 921742     | ARS429     | +                  | 21.572              | 0.243                 |
| chrIV      | 316878     | ARS412     | +                  | 24.365              | 0.289                 |

|         |         |          |   |        |       |
|---------|---------|----------|---|--------|-------|
| chrIV   | 123677  | ARS406   | + | 27.245 | 0.512 |
| chrIV   | 1057893 | ARS431   | + | 29.587 | 0.506 |
| chrIX   | 73953   | ARS907   | - | 19.888 | 0.350 |
| chrIX   | 105966  | ARS909   | - | 21.972 | 0.790 |
| chrIX   | 412000  | ARS922   | - | 22.149 | 0.660 |
| chrIX   | 342028  | ARS919   | - | 27.051 | 0.579 |
| chrIX   | 310739  | ARS916   | - | 30.660 | 0.557 |
| chrIX   | 214733  | ARS913   | + | 15.871 | 0.643 |
| chrIX   | 175171  | ARS912   | + | 26.345 | 0.628 |
| chrIX   | 357223  | ARS920   | + | 26.473 | 0.604 |
| chrIX   | 80373   | ARS908   | + | 28.215 | 0.413 |
| chrV    | 173807  | ARS511   | - | 18.779 | 0.890 |
| chrV    | 59469   | ARS507   | - | 19.620 | 0.798 |
| chrV    | 145713  | ARS510   | - | 19.651 | 0.583 |
| chrV    | 406902  | ARS517   | - | 19.977 | 0.881 |
| chrV    | 94056   | ARS508   | + | 17.251 | 0.914 |
| chrV    | 353583  | ARS516   | + | 20.327 | 0.833 |
| chrV    | 569630  | ARS523   | + | 21.305 | 0.403 |
| chrV    | 287566  | ARS514   | + | 26.321 | 0.502 |
| chrV    | 212455  | ARS512   | + | 26.816 | 0.727 |
| chrV    | 498900  | ARS520   | + | 27.741 | 0.758 |
| chrV    | 549586  | ARS522   | + | 30.072 | 0.372 |
| chrVI   | 167731  | ARS606   | - | 20.287 | 0.756 |
| chrVI   | 118678  | ARS603.5 | - | 26.961 | 0.556 |
| chrVI   | 136037  | ARS605   | - | 36.277 | 0.247 |
| chrVI   | 199402  | ARS607   | + | 15.378 | 0.936 |
| chrVI   | 127869  | ARS604   | + | 19.365 | 0.299 |
| chrVI   | 68832   | ARS603   | + | 25.803 | 0.659 |
| chrVII  | 485115  | ARS719   | - | 16.890 | 0.771 |
| chrVII  | 834669  | ARS731   | - | 17.174 | 0.860 |
| chrVII  | 508911  | ARS720   | - | 19.346 | 0.464 |
| chrVII  | 653836  | ARS726   | - | 19.528 | 0.603 |
| chrVII  | 388849  | ARS717   | - | 20.561 | 0.773 |
| chrVII  | 977910  | ARS733   | - | 21.676 | 0.608 |
| chrVII  | 421285  | ARS718   | - | 21.747 | 0.825 |
| chrVII  | 352866  | ARS716   | - | 25.985 | 0.717 |
| chrVII  | 64458   | ARS702   | - | 30.001 | 0.633 |
| chrVII  | 660004  | ARS727   | - | 31.979 | 0.335 |
| chrVII  | 17906   | ARS700.5 | - | 33.251 | 0.294 |
| chrVII  | 1083677 | ARS131a  | + | 17.176 | 0.268 |
| chrVII  | 888418  | ARS731.5 | + | 17.603 | 0.786 |
| chrVII  | 715319  | ARS728   | + | 21.386 | 0.803 |
| chrVII  | 163242  | ARS707   | + | 23.729 | 0.666 |
| chrVII  | 203978  | ARS710   | + | 32.839 | 0.466 |
| chrVIII | 392250  | ARS818   | - | 20.133 | 0.462 |

|         |         |           |   |        |       |
|---------|---------|-----------|---|--------|-------|
| chrVIII | 501949  | ARS822    | - | 20.436 | 0.657 |
| chrVIII | 447794  | ARS820    | - | 20.891 | 0.891 |
| chrVIII | 359698  | ARS816    | - | 21.387 | 0.699 |
| chrVIII | 45778   | ARS804    | - | 27.409 | 0.216 |
| chrVIII | 297102  | ARS815    | + | 19.650 | 0.908 |
| chrVIII | 64301   | ARS805    | + | 21.111 | 0.637 |
| chrVIII | 168599  | ARS809    | + | 23.838 | 0.563 |
| chrVIII | 245791  | ARS813    | + | 25.611 | 0.834 |
| chrVIII | 556152  | ARS824    | + | 38.395 | 0.163 |
| chrX    | 417311  | ARS1014   | - | 18.061 | 0.769 |
| chrX    | 654465  | ARS1020   | - | 20.441 | 0.483 |
| chrX    | 442416  | ARS1015   | - | 22.269 | 0.271 |
| chrX    | 113736  | ARS1007   | - | 22.705 | 0.662 |
| chrX    | 67713   | ARS1005   | - | 24.249 | 0.834 |
| chrX    | 228567  | ARS1009   | - | 26.895 | 0.449 |
| chrX    | 374861  | ARS1012   | + | 16.843 | 0.790 |
| chrX    | 683928  | ARS1021   | + | 21.242 | 0.836 |
| chrX    | 161448  | ARS1007.5 | + | 22.882 | 0.679 |
| chrXI   | 55867   | ARS1103   | - | 20.460 | 0.859 |
| chrXI   | 329502  | ARS1109   | - | 23.609 | 0.669 |
| chrXI   | 213310  | ARS1106.7 | - | 24.563 | 0.611 |
| chrXI   | 153125  | ARS1106   | - | 24.774 | 0.742 |
| chrXI   | 457168  | ARS1114.5 | - | 26.925 | 0.386 |
| chrXI   | 612053  | ARS1120   | - | 27.419 | 0.660 |
| chrXI   | 388668  | ARS1112   | + | 23.775 | 0.708 |
| chrXI   | 98390   | ARS1104.5 | + | 23.943 | 0.806 |
| chrXI   | 257590  | ARS1107   | + | 24.564 | 0.823 |
| chrXI   | 642422  | ARS1123   | + | 24.832 | 0.285 |
| chrXI   | 416884  | ARS1113   | + | 27.822 | 0.508 |
| chrXII  | 373328  | ARS1213   | - | 16.165 | 0.924 |
| chrXII  | 513085  | ARS1217   | - | 18.729 | 0.929 |
| chrXII  | 412853  | ARS1215   | - | 20.842 | 0.791 |
| chrXII  | 794192  | ARS1226   | - | 21.585 | 0.724 |
| chrXII  | 231251  | ARS1211   | + | 18.443 | 0.886 |
| chrXII  | 1007238 | ARS1232   | + | 22.050 | 0.653 |
| chrXII  | 659895  | ARS1220   | + | 23.299 | 0.616 |
| chrXII  | 730540  | ARS1222   | + | 24.034 | 0.617 |
| chrXII  | 243743  | ARS1211.5 | + | 31.538 | 0.195 |
| chrXII  | 622861  | ARS1219   | + | 31.913 | 0.218 |
| chrXII  | 1013787 | ARS1233   | + | 34.939 | 0.206 |
| chrXIII | 503627  | ARS1319   | - | 18.955 | 0.693 |
| chrXIII | 535769  | ARS1320   | - | 20.864 | 0.788 |
| chrXIII | 94390   | ARS1305   | - | 22.511 | 0.759 |
| chrXIII | 554598  | ARS1322   | - | 23.191 | 0.351 |
| chrXIII | 897975  | ARS1332   | - | 25.787 | 0.812 |

|         |        |           |   |        |       |
|---------|--------|-----------|---|--------|-------|
| chrXIII | 40132  | ARS1304   | - | 30.096 | 0.243 |
| chrXIII | 758416 | ARS1327   | - | 31.011 | 0.569 |
| chrXIII | 815391 | ARS1330   | + | 18.728 | 0.702 |
| chrXIII | 31767  | ARS1303   | + | 20.124 | 0.346 |
| chrXIII | 263127 | ARS1309   | + | 20.780 | 0.589 |
| chrXIII | 634521 | ARS1324   | + | 21.295 | 0.449 |
| chrXIII | 433030 | ARS1315   | + | 21.650 | 0.590 |
| chrXIII | 137322 | ARS1307   | + | 21.664 | 0.675 |
| chrXIII | 805162 | ARS1329   | + | 23.111 | 0.410 |
| chrXIII | 371020 | ARS1312   | + | 23.242 | 0.832 |
| chrXIII | 649362 | ARS1325   | + | 23.833 | 0.570 |
| chrXIII | 159062 | ARS1307.5 | + | 27.358 | 0.438 |
| chrXIII | 611318 | ARS1323   | + | 33.987 | 0.479 |
| chrXIV  | 89756  | ARS1407   | - | 22.498 | 0.673 |
| chrXIV  | 280067 | ARS1414   | - | 23.015 | 0.690 |
| chrXIV  | 691682 | ARS1427   | - | 23.675 | 0.672 |
| chrXIV  | 635835 | ARS1426   | - | 26.400 | 0.509 |
| chrXIV  | 412443 | ARS1417   | - | 27.879 | 0.727 |
| chrXIV  | 546150 | ARS1421   | - | 28.955 | 0.352 |
| chrXIV  | 449538 | ARS1419   | - | 30.269 | 0.616 |
| chrXIV  | 322006 | ARS1415   | + | 20.947 | 0.780 |
| chrXIV  | 609538 | ARS1424   | + | 23.739 | 0.779 |
| chrXIV  | 499042 | ARS1420   | + | 25.434 | 0.725 |
| chrXIV  | 61696  | ARS1406   | + | 28.945 | 0.584 |
| chrXV   | 277733 | ARS1511   | - | 19.353 | 0.889 |
| chrXV   | 309249 | ARS1512   | - | 19.762 | 0.424 |
| chrXV   | 874369 | ARS1526   | - | 22.955 | 0.616 |
| chrXV   | 155258 | ARS1509.5 | - | 28.308 | 0.165 |
| chrXV   | 337484 | ARS1513   | - | 31.274 | 0.389 |
| chrXV   | 85360  | ARS1508   | - | 31.364 | 0.341 |
| chrXV   | 167004 | ARS1510   | + | 21.679 | 0.788 |
| chrXV   | 113910 | ARS1509   | + | 22.066 | 0.746 |
| chrXV   | 766691 | ARS1523   | + | 23.198 | 0.767 |
| chrXV   | 436793 | ARS1513.5 | + | 24.732 | 0.610 |
| chrXV   | 72689  | ARS1507   | + | 25.645 | 0.581 |
| chrXV   | 908311 | ARS1528   | + | 33.991 | 0.278 |
| chrXV   | 35714  | ARS1506.5 | + | 34.024 | 0.199 |
| chrXVI  | 777096 | ARS1626.5 | - | 17.945 | 0.838 |
| chrXVI  | 43150  | ARS1604   | - | 19.931 | 0.170 |
| chrXVI  | 695620 | ARS1625   | - | 25.280 | 0.689 |
| chrXVI  | 842852 | ARS1628   | - | 33.042 | 0.415 |
| chrXVI  | 289531 | ARS1614   | + | 18.272 | 0.623 |
| chrXVI  | 73105  | ARS1605   | + | 20.350 | 0.745 |
| chrXVI  | 384595 | ARS1618   | + | 20.991 | 0.560 |
| chrXVI  | 633924 | ARS1623   | + | 21.153 | 0.895 |

|         |         |           |   |        |       |
|---------|---------|-----------|---|--------|-------|
| chrXVI  | 511707  | ARS1621   | + | 22.719 | 0.693 |
| chrXVI  | 116594  | ARS1607   | + | 23.358 | 0.636 |
| chrXVI  | 684408  | ARS1624   | + | 31.888 | 0.333 |
| chrI    | 215011  | ARS111    | - | 18.780 | 0.670 |
| chrI    | 6572    | ARS201    | - | 26.714 | 0.379 |
| chrII   | 539400  | ARS218    | - | 18.339 | 0.356 |
| chrII   | 517285  | ARS217    | - | 22.380 | 0.192 |
| chrII   | 143692  | ARS206    | - | 26.351 | 0.586 |
| chrII   | 741781  | ARS224    | - | 28.218 | 0.521 |
| chrII   | 591434  | ARS219    | + | 18.575 | 0.447 |
| chrII   | 93553   | ARS203    | + | 22.068 | 0.315 |
| chrII   | 379119  | ARS212    | + | 26.964 | 0.386 |
| chrII   | 757485  | ARS225    | + | 30.997 | 0.319 |
| chrIII  | 273027  | ARS316    | - | 22.416 | 0.465 |
| chrIV   | 1033263 | ARS430.5  | - | 16.136 | 0.434 |
| chrIV   | 236050  | ARS409.5  | - | 20.600 | 0.681 |
| chrIV   | 101241  | ARS405.5  | - | 21.706 | 0.471 |
| chrIV   | 1487095 | ARS446    | - | 24.132 | 0.454 |
| chrIV   | 852     | ARS400    | - | 25.988 | 0.566 |
| chrIV   | 1110136 | ARS431.5  | - | 27.711 | 0.629 |
| chrIV   | 86124   | ARS405    | - | 42.903 | 0.189 |
| chrIV   | 702929  | ARS422    | + | 21.481 | 0.701 |
| chrIV   | 1404327 | ARS440    | + | 22.368 | 0.489 |
| chrIV   | 1276272 | ARS434    | + | 27.188 | 0.651 |
| chrIV   | 1240924 | ARS433    | + | 27.513 | 0.820 |
| chrIV   | 845128  | ARS426.5  | + | 28.403 | 0.359 |
| chrIV   | 253841  | ARS410    | + | 29.972 | 0.183 |
| chrIX   | 136287  | ARS911    | - | 22.478 | 0.561 |
| chrV    | 520952  | ARS521    | + | 30.851 | 0.392 |
| chrVII  | 187407  | ARS709    | + | 28.594 | 0.394 |
| chrVII  | 1063520 | ARS735.5  | + | 33.917 | 0.580 |
| chrVIII | 535621  | ARS823.5  | - | 28.884 | 0.540 |
| chrX    | 730035  | ARS1023   | + | 17.486 | 0.196 |
| chrX    | 337270  | ARS1011   | + | 20.057 | 0.494 |
| chrX    | 298838  | ARS1010   | + | 25.888 | 0.678 |
| chrX    | 23928   | ARS1004   | + | 48.747 | 0.337 |
| chrXII  | 52108   | ARS1203   | - | 24.886 | 0.337 |
| chrXII  | 888740  | ARS1227.5 | - | 25.101 | 0.768 |
| chrXII  | 289421  | ARS1212   | - | 28.695 | 0.684 |
| chrXII  | 1024153 | ARS1234   | - | 29.394 | 0.409 |
| chrXII  | 822105  | ARS1227   | + | 28.461 | 0.668 |
| chrXIII | 468237  | ARS1316   | + | 23.344 | 0.441 |
| chrXIII | 688918  | ARS1326   | + | 28.514 | 0.392 |
| chrXIII | 878735  | ARS1331.7 | + | 30.640 | 0.262 |
| chrXIII | 772677  | ARS1328   | + | 32.178 | 0.310 |

|        |        |           |   |        |       |
|--------|--------|-----------|---|--------|-------|
| chrXIV | 250465 | ARS1413   | - | 25.503 | 0.530 |
| chrXIV | 764337 | ARS1429   | - | 26.026 | 0.416 |
| chrXIV | 169749 | ARS1411   | - | 27.602 | 0.622 |
| chrXIV | 196226 | ARS1412   | - | 31.148 | 0.626 |
| chrXIV | 126679 | ARS1410   | - | 37.763 | 0.342 |
| chrXIV | 738730 | ARS1428.5 | + | 35.238 | 0.442 |
| chrXV  | 566598 | ARS1516   | - | 21.689 | 0.780 |
| chrXV  | 681350 | ARS1520   | - | 29.163 | 0.622 |
| chrXV  | 729797 | ARS1521   | + | 19.448 | 0.316 |
| chrXV  | 783388 | ARS1524   | + | 22.563 | 0.346 |
| chrXV  | 656703 | ARS1519   | + | 26.471 | 0.632 |
| chrXVI | 584397 | ARS1622.7 | - | 29.081 | 0.259 |
| chrXVI | 331771 | ARS1617   | + | 23.235 | 0.477 |
| chrXVI | 880921 | ARS1630   | + | 30.530 | 0.613 |

The 178 ARS analyzed for BrdU incorporation (Fig. 1, 4 and 5) are indicated in grey.

**Supplemental Table 2. List of strains used in this study**

| <b>Strain</b>        | <b>Lab name</b> | <b>Genotype</b>                                                                                                                             |
|----------------------|-----------------|---------------------------------------------------------------------------------------------------------------------------------------------|
| Nrd1-AA              | FSY5348         | <i>MAT a, tor1-1, fpr1::NAT, RPL13A-2×FKBP12::TRP1, NRD1-FRB::KanMX6, bar1::LEU2, BrdU-inc::HIS3, ura3-1, ade2-1</i>                        |
| Nrd1-AA <i>set2Δ</i> | FSY7284         | <i>MAT a, tor1-1, fpr1::NAT, RPL13A-2×FKBP12::TRP1, NRD1-FRB::KanMX6, bar1::LEU2, BrdU-inc::HIS3, set2 ::URA3, ade2-1</i>                   |
| Rrp6-AA              | FSY5725         | <i>MAT a, tor1-1, fpr1::loxP-LEU2-loxP, RPL13A-2×FKBP12::loxP, RRP6-FRB::KanMX6, bar1::URA3, BrdU-inc::HIS3, ade 2-1 trp1-1, leu2-3,112</i> |
| Ysh1-AA              | FSY7715         | <i>MAT a, tor1-1, fpr1::loxP-LEU2-loxP, RPL13A-2×FKBP12::loxP, YSH1-FRB::KanMX6, bar1::URA3, BrdU-inc::HIS3, ade 2-1 trp1-1, leu2-3,112</i> |
